# Supplementary material for: Tuning photoluminescence and surface properties of carbon nanodots for chemical sensing
Source: Royal Society of Chemistry journal article supplement (doi:10.1039/c5nr06534h), 2015-11-23
Supplement: c5nr06534h1.pdf [file c5nr06534h1.pdf]

# Tuning photoluminescence and surface properties of carbon nanodots for chemical sensing

*Zhaomin Zhang,<sup>a</sup> Yi Pan,<sup>a</sup> Yaning Fang,<sup>a</sup> Lulu Zhang,<sup>a</sup> Junying Chen,<sup>a</sup> Changqing Yi<sup>a\*</sup>*

- a. Key Laboratory of Sensing Technology and Biomedical Instruments (Guangdong Province), School of Engineering, Sun Yat-Sen University, Guangzhou, China.

---

\* Corresponding author. Email: [yichq@mail.sysu.edu.cn](mailto:yichq@mail.sysu.edu.cn); Tel: 86-20-39342380.

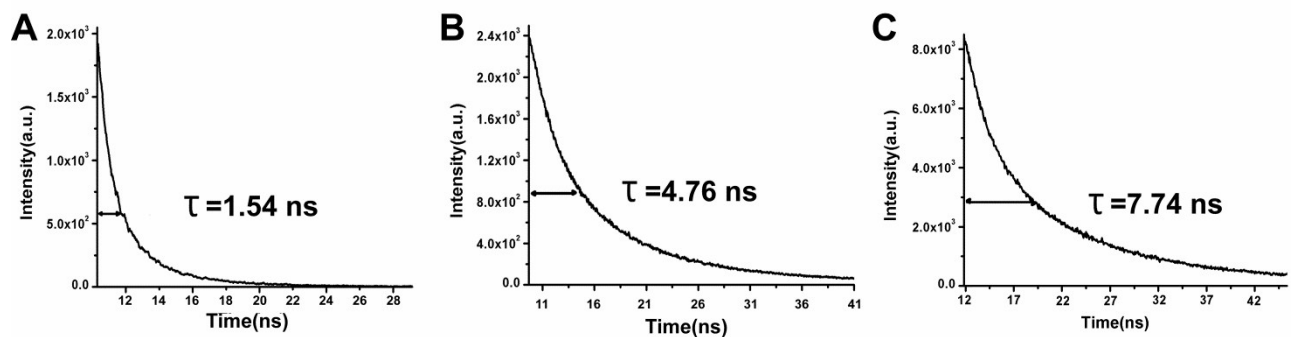

**Figure S1.** Photoluminescence decay spectra of B-fCDs (A), G-fCDs (B) and O-fCDs (C).

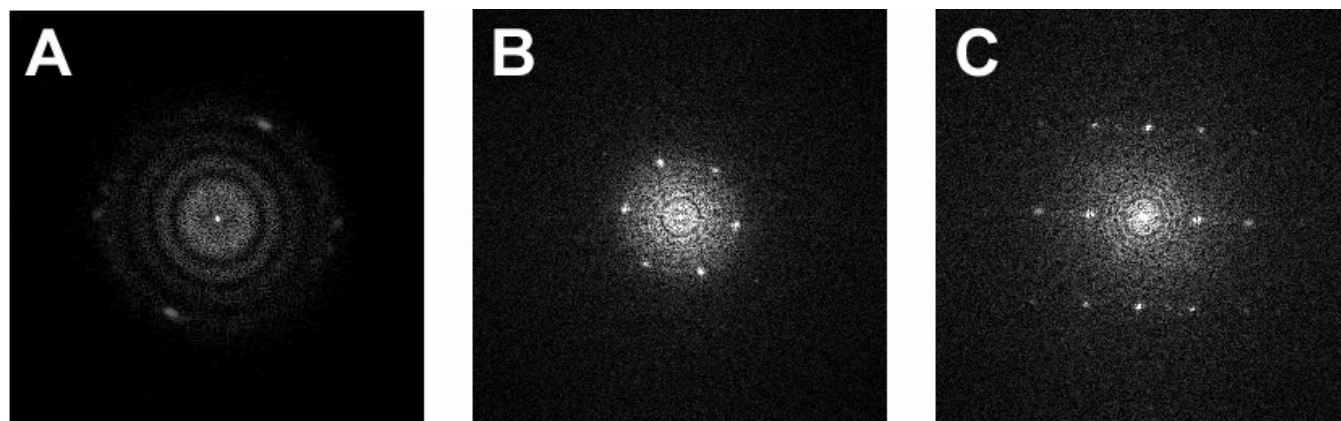

**Figure S2.** Photoluminescence decay spectra of B-fCDs (A), G-fCDs (B) and O-fCDs (C).

**Table S1.** Elemental analysis results of B-fCDs, G-fCDs and O-fCDs.

| Name   | Weight (mg) | C (%) | H (%) | N (%) | O (%)  | C/N ratio | C/H ratio | O/C ratio |
|--------|-------------|-------|-------|-------|--------|-----------|-----------|-----------|
| B-fCDs | 1.8170      | 51.63 | 8.236 | 0     | 40.134 | 0         | 6.2694    | 0.777     |
| G-fCDs | 2.0680      | 51.80 | 7.740 | 0     | 40.46  | 0         | 6.6926    | 0.781     |
| O-fCDs | 1.9260      | 53.38 | 8.654 | 0.83  | 37.136 | 64.0789   | 6.1680    | 0.696     |

**Table S2.** Comparison of Fe<sup>3+</sup> detection system based on different nanoprobcs

| <b>Nanoprobe</b>                                    | <b>Linear range</b> | <b>LOD</b> | <b>Ex<sub>max</sub> (nm)</b> | <b>Em<sub>max</sub> (nm)</b> | <b>Time</b> | <b>Ref.</b> |
|-----------------------------------------------------|---------------------|------------|------------------------------|------------------------------|-------------|-------------|
| <b>germanium nanocrystals (Ge NCs)</b>              | 0-800 μM            | 0.83 μM    | 340                          | 430                          | 2 min       | [1]         |
| <b>Grapheme oxide (AGO)</b>                         | 0-120 μM            | 4.6 μM     | 350                          | 450                          | 4 min       | [2]         |
| <b>Fluorescent organic nanoparticles (NDQ FONs)</b> | 1 nm-100 μM         | 0.35 nM    | 403                          | 515-524                      | -           | [3]         |
| <b>GQDs</b>                                         | 0-400 μM            | 7.22 μM    | 360                          | 440                          | -           | [4]         |
| <b>fluorescent graphitic carbon nitride</b>         | 0-50 μM             | 1 nM       | 360                          | 437                          | 10 min      | [5]         |
|                                                     | -                   | 17.9 μM    | 360                          | 450                          | -           | [6]         |
|                                                     | 0.04-50 mM          | 0.04 μM    | 380                          | 450-510                      | -           | [7]         |
|                                                     | 0-50 μM             | 0.02 μM    | 340                          | 405                          | 5 min       | [8]         |
| <b>fCDs</b>                                         | 0.025-100 μM        | 0.075 μM   | 330                          | 440                          | < 4 min     | [9]         |
|                                                     | 0.002-5 μM          | 2 nM       | 340                          | 445                          | 5 s         | [10]        |
|                                                     | 10-60 μM            | 1 μM       | 370                          | 417                          | -           | [11]        |
|                                                     | 0.50-1000 μM        | 0.43 μM    | 470                          | 600                          | <5 s        | This work   |

## References

- [1] D. Carolan, H. Doyle, *Nanoscale*, 2015, **7**, 5488.
- [2] L. He, J. N. Li, J. H. Xin, *Biosens. Bioelectron.*, 2015, **70**, 69.
- [3] C. P. Han, T. H. Huang, Q. Liu, H. T. Xu, Y. P. Zhuang, J. J. Li, J. F. Hu, A. M. Wang, K. Xu, *J. Mater. Chem. C*, 2014, **2**, 9077.

- [4] A. Ananthanarayanan, X. W. Wang, P. Routh, B. Sana, S. Lim, D. H. Kim, K. H. Lim, J. Li, P. Chen, *Adv. Funct. Mater.*, 2014, **24**, 3021.
- [5] S. W. Zhang, J. X. Li, M. Y. Zeng, J. Z. Xu, X. K. Wang, W. P. Hu, *Nanoscale*, 2014, **6**, 4157.
- [6] S. J. Zhu, Q. N. Meng, L. Wang, J. H. Zhang, Y. B. Song, H. Jin, K. Zhang, H. C. Sun, H. Y. Wang, B. Yang, *Angew. Chem. Int. Ed.*, 2013, **52**, 3953.
- [7] S. N. Qu, H. Chen, X. M. Zheng, J. S. Cao, X. Y. Liu, *Nanoscale*, 2013, **5**, 5514.
- [8] A. D. Zhao, C. Q. Zhao, M. Li, J. S. Ren, X. G. Qu. *Anal. Chim. Acta*, 2014, **809**, 128.
- [9] J. Yu, N. Song, Y. K. Zhang, S. X. Zhong, A. J. Wang, J. R. Chen, *Sens. Actuator B-Chem.*, 2015, **214**, 29.
- [10] Y. L. Zhang, L. Wang, H. C. Zhang, Y. Liu, H. Y. Wang, Z. H. Kang, S. T. Lee, *RSC Adv.*, 2013, **3**, 3733.
- [11] Y. L. Jiang, Q. R. Han, C. Jin, J. Zhang, B. X. Wang, *Mater. Lett.*, 2015, **141**, 366.
